# Supplementary material for: ciRS-7 exonic sequence is embedded in a long non-coding RNA locus
Source: PubMed Central journal article supplement (PMC5745005; doi:10.1371/journal.pgen.1007114), 2017-12-13
Supplement: pgen.1007114.s018.pdf [file pgen.1007114.s018.pdf]

```
# perl script to split reads from unaligned KNIFE output

$myflag=" ";
$genome="mm10";
$readir="/*/*/*/*/*KNIFE_dirs/knife_outputs/mouse_AgoRIP_SRR1785046/orig/unaligned/";
$stem="mouse_rip";

$genome="hg19";
$readir="/*/*/*/*/*knife_out/H1ESC_01192017/orig/unaligned/";
$stem="H1ESC_find";

$remake=1;
$mysize=20;
if ($remake==1){
system ("rm read1_".$stem);
system ("rm read2_".$stem);

#opendir (DIR, $readir);
$fastq=1;
$prefix="";
$fastq=0;
$prefix=">";

$offset=50; # where to start the pseudo read 2
#foreach my $fp (glob("$readir/*fasta")) {
    print "readdir is $readir\n";
    foreach my $fp (glob("$readir/*fasta")) {

## code splits reads into kmers
print "$fp\n";
open (F,$fp);
open (R1,">>read1_".$stem);
open (R2,">>read2_".$stem);

$i=0;
while ($he=<F>){
$i=$i+1;
chomp($he);
$he2=substr($he,0,$mysize);
$h=<F>;
chomp($h);
    $myl=length($h);
    # take 20mers;
    $mysb1=substr($h,0,$mysize);
```

```

        $mysb2=substr($h,$offset,$mysize);
#print "$h\n$mysb1\t$mysb2\n";
if (length($mysb1)>0 & length($mysb2)>0){
    print R1 $prefix.$he."_".$.i."_read_5\n$mysb1\n";
    print R2 $prefix.$he."_".$.i."_read_3\n$mysb2\n";

        $d=<F>;
    if ($fastq==1){
        print R1 "$d\n";
        print R2 "$d\n";
    }

        $d=<F>;
    if ($fastq==1){
        $d2=substr($d,0,$mysize);
        print R1 "$d2\n";
        print R2 "$d2\n";
    }

#    print ">".$.i."_read_5\n$mysb1\n";
#    print ">".$.i."_read_3\n$mysb2\n";
    }
}
}

if (!($fastq)) {$myflag=" -f ";}

$genome=""; # for mouse
$genome= "human_"; # for human
system (" bowtie2 -p 8 ".$myflag." -x kalisto_index/"$.genome."Cdr1_up_down_100k
read2_".$.stem." > orphanbowtie_2_cdr1_".$.stem);

system( " bowtie2 -p 8 ".$myflag." -x kalisto_index/"$.genome."Cdr1_up_down_100k
read1_".$.stem." > orphanbowtie_1_cdr1_".$.stem);

```

```
##R SCRIPT
```

```
library(data.table)
```

```
## processing at the command line
```

```
#more orphanbowtie_2_cdr1_mouse_RIP |grep uc > uc_orphanbowtie_2_mouse_rip  
#more orphanbowtie_1_cdr1_mouse_RIP |grep uc > uc_orphanbowtie_1_mouse_rip  
#grep uc orphanbowtie_1_cdr1_H1ESC_find > uc_orphanbowtie_1_cdr1_H1ESC_find  
#grep uc orphanbowtie_2_cdr1_H1ESC_find > uc_orphanbowtie_2_cdr1_H1ESC_find
```

```
#infile="mouse_rip"  
#infile="cdr1_H1ESC_find"
```

```
for (infile in (c("cdr1_H1ESC_find", "mouse_rip"))) {  
  rm(myt)  
  #for (infile in (c("cdr1_H1ESC_find"))) {
```

```
    m1=data.table(read.delim(paste("uc_orphanbowtie_1_", infile,sep=""), header=F,  
    skip=1)[,c(1:10)])  
    m2=data.table(read.delim(paste("uc_orphanbowtie_2_", infile,sep=""), header=F,  
    skip=1)[,c(1:10)])
```

```
## split
```

```
m1[,readid:= as.character(lapply(strsplit(paste(m1$V1), split="r"), "[", 1))]  
m2[,readid:= as.character(lapply(strsplit(paste(m2$V1), split="r"), "[", 1))]
```

```
m1[,readL:=nchar(paste(m1$V10))]  
m2[,readL:=nchar(paste(m2$V10))]
```

```
mq=(-1) #  
lower.l=18
```

```
used=merge(m1[V5>mq & readL>lower.l,list(readid,V2,V4,V10, readL)],m2[V5>mq &  
readL>lower.l,list(readid,V2,V4,V10,readL)], by="readid")
```

```
used[,V4.x:=V4.x+ -100000]  
used[,V4.y:=V4.y-100000]
```

```
#table for for human ESC
```

```
if (infile %like% "H1"){
```

```

myt=used[(abs(V4.y)<2000| abs(V4.x)<2000 )& V2.x==V2.y & abs(V4.x-V4.y)>1000][order(-
abs(abs(V4.x-V4.y))), list(V4.x,V4.y, V4.x-V4.y, V10.x, V10.y, readL.x,readL.y,readid)]
}

#for mouse
if (infile %like% "mouse"){

myt=used[(abs(V4.y)<2500| abs(V4.x)<2500 )& V2.x==V2.y & abs(V4.x-V4.y)>1000][order(-
abs(abs(V4.x-V4.y))), list(V4.x,V4.y, V4.x-V4.y, V10.x, V10.y, readL.x,readL.y,readid)][V4.x<V4.y]

## with T appended, new circle splicing

#>
myt2=used[abs(V4.x)<1000 & V4.y<(-500)& (V4.x)<(-500 )& V2.x==V2.y & abs(V4.x-
V4.y)>500][order(-abs(abs(V4.x-V4.y))), list(V4.x,V4.y, V4.x-V4.y, V10.x, V10.y,
readL.x,readL.y,readid)]

#top reads are linear isoforms
#>

myt=cbind(myt,myt2)

}
names(myt)[1:5]=c("offset_1","offset_2","absdiff","seq1","seq2")

write.table(file=paste(infile,"_Routput.tab", sep=""),myt[,1:8], sep="\t", quote=F ,
row.names=F)
}

```

# HUMAN OUTPUT

(Offsets are with respect to the annotated ciRS-7 transcript)

| READ-id                        | offset_1 | offset_2 | absdiff | seq1                  | seq2                  | Splice           |
|--------------------------------|----------|----------|---------|-----------------------|-----------------------|------------------|
| >SRR5048129.92905492_2774860_  | 25       | -10841   | 10866   | GTCTTCCAACAACCTCCGGGC | CACACGTGTTGTGCATACAAA | Novel Linear RNA |
| >SRR5048080.59411858_2626289_  | 1443     | 7835     | -6392   | GATCTTCTGACATTCAGGTC  | TAAAGACTTTATAACTTCCA  | Novel Linear RNA |
| >SRR5048080.100875739_3206966_ | 21       | 1456     | -1435   | CAAGGTCTTCCAACAACCTCC | TCAGGTCTTCCAGTGTCTGC  | ciRS-7 circle    |
| >SRR5048080.103424773_5101672_ | 1457     | 22       | 1435    | CAGGTCTTCCAGTGTCTGCA  | AAGGTCTTCCAACAACCTCCG | ciRS-7 circle    |
| >SRR5048080.103561152_236718_  | 12       | 1447     | -1435   | CACCTGTGTCAAGGTCTTCC  | TTCTGACATTCAGGTCTTCC  | ciRS-7 circle    |
| >SRR5048080.104022166_1418013_ | 1443     | 8        | 1435    | GATCTTCTGACATTCAGGTC  | ATGGCACCTGTGTCAAGGTC  | ciRS-7 circle    |
| >SRR5048080.17777487_4616291_  | 23       | 1458     | -1435   | AGGTCTTCCAACAACCTCCGG | AGGTCTGCCAGTGTCTGCAA  | ciRS-7 circle    |
| >SRR5048080.22632841_6033667_  | 24       | 1459     | -1435   | GGTCTTCCAACAACCTCAGGG | GGTCTTCCAGTGTCTGCAAT  | ciRS-7 circle    |
| >SRR5048080.24019860_2118332_  | 22       | 1457     | -1435   | AAGGTCTTCCAACAACCTCCG | CAGGTCTTCCAGTGTCTGCA  | ciRS-7 circle    |
| >SRR5048080.25232605_5539467_  | 1449     | 14       | 1435    | CTGACATTCAGGTCTTCCAG  | CCTGTGTCAAGGTCTTCCAA  | ciRS-7 circle    |
| >SRR5048080.25619456_2851736_  | 12       | 1447     | -1435   | CACCTGTGTCAAGGTCTTCC  | TTCTGACATTCAGGTCTTCC  | ciRS-7 circle    |
| >SRR5048080.26343594_3864290_  | 16       | 1451     | -1435   | TGTGTCAAGGTCTTCCAACA  | GACATTCAGGTCTTCCAGTG  | ciRS-7 circle    |
| >SRR5048080.33788535_4485555_  | 25       | 1460     | -1435   | GTCTTCCAACAACCTCCGGGC | GTCTTCCAGTGTCTGCAATA  | ciRS-7 circle    |
| >SRR5048080.34113819_4397163_  | 27       | 1462     | -1435   | CTTCCAACAACCTCCGGGTCT | CTTCCAGTGTCTACAATATC  | ciRS-7 circle    |
| >SRR5048080.40020025_3937366_  | 1447     | 12       | 1435    | TTCTGACATTCAGGTCTTCC  | CACCTGTGTCAAGGTCTTCC  | ciRS-7 circle    |
| >SRR5048080.40408537_5095838_  | 1433     | -2       | 1435    | CCAGTGTGTGATCTTCTGA   | AGGGTTCCGATGGCACCTG   | ciRS-7 circle    |
| >SRR5048080.41137295_36171_    | -10      | 1425     | -1435   | CAATATCCAGGGTTCCGAT   | CAACGTCTCCAGTGTGCTGA  | ciRS-7 circle    |
| >SRR5048080.52818665_2370515_  | 1442     | 7        | 1435    | TGATCTTCTGACATTCAGGT  | GATGGCACCTGTGTCAAGGT  | ciRS-7 circle    |
| >SRR5048080.57104984_1008060_  | 24       | 1459     | -1435   | GGTCTTCCAACAACCTCCGGG | GGTCTTCCAGTGTCTGCAAT  | ciRS-7 circle    |
| >SRR5048080.57671465_827516_   | 1443     | 8        | 1435    | GATCTTCTGACATTCAGGTC  | ATGGCACCTGTGTCAAGGTC  | ciRS-7 circle    |
| >SRR5048080.59527248_6020342_  | 1464     | 29       | 1435    | TCCAGTGTCTGCAATATCCA  | TCCAACAACCTCCGGGTCTTC | ciRS-7 circle    |
| >SRR5048080.60338221_336699_   | 1436     | 1        | 1435    | GTGTGCTGATCTTCTGACAT  | GTTCCGATGGCACCTGTGT   | ciRS-7 circle    |
| >SRR5048080.60742841_4434991_  | 13       | 1448     | -1435   | ACCTGTGTCAAGGTCTTCCA  | TCTGACATTCAGGTCTTCCA  | ciRS-7 circle    |
| >SRR5048080.60767964_3939516_  | 1447     | 12       | 1435    | TTCTGACATTCAGGTCTTCC  | CACCTGTTCAAGGTCTTCC   | ciRS-7 circle    |
| >SRR5048080.65042132_5189714_  | 25       | 1460     | -1435   | GTCTTCCAACAACCTCCGGGC | GTCTTCCAGTGTCTGCAATA  | ciRS-7 circle    |
| >SRR5048080.6766034_3745788_   | 16       | 1451     | -1435   | TGTGTCAAGGTCTTCCAACA  | GACATTCAGGTCTTCCAGTG  | ciRS-7 circle    |
| >SRR5048080.68598631_2481961_  | 32       | 1467     | -1435   | AACAACCTCCGGGTCTTCCAG | AGTGTCTGCAATATCCAGGG  | ciRS-7 circle    |
| >SRR5048080.70252381_1985001_  | 25       | 1460     | -1435   | GTCTTCCAACAACCTCCGGGC | GTCTTCCAGTGTCTGCAATA  | ciRS-7 circle    |
| >SRR5048080.76978837_5758561_  | 15       | 1450     | -1435   | CTGTGTCAAGGTCTTCCAAC  | TGACATTCAGGTCTTCCAGT  | ciRS-7 circle    |
| >SRR5048080.77628051_5856711_  | 1440     | 5        | 1435    | GCTGATCTTCTGACATTCAG  | CCGATGGCACCTGTGTCAAG  | ciRS-7 circle    |
| >SRR5048080.80443644_1003727_  | 1439     | 4        | 1435    | TGTGATCTTCTGACATTC    | TCCNATGGCACCTGTGTCAA  | ciRS-7 circle    |
| >SRR5048080.81980405_4719362_  | 1448     | 13       | 1435    | TCTGACATTCAGGTCTTCCA  | ACCTGTGTCAAGGTCTTCCA  | ciRS-7 circle    |
| >SRR5048080.83748541_4352065_  | 25       | 1460     | -1435   | GTCTTCCAACAACCTCCGGGC | GTCTTCCAGTGTCTGCAATA  | ciRS-7 circle    |
| >SRR5048080.87512496_5740796_  | 1446     | 11       | 1435    | CTTCTGACATTCAGGTCTTC  | GCACCTGTGTCAAGGTCTTC  | ciRS-7 circle    |
| >SRR5048080.88581756_1524552_  | 1439     | 4        | 1435    | TGCTGATCTTCTGACATTC   | TCCGATGGCACCTGTGTCAA  | ciRS-7 circle    |
| >SRR5048080.92538225_262888_   | 21       | 1456     | -1435   | CAAGGTCTTCCAACAACCTCC | TCAGGTCTTCCAGTGTCTGC  | ciRS-7 circle    |
| >SRR5048080.94482953_3613367_  | 27       | 1462     | -1435   | CTTCCAACAACCTCCGGGTCT | CTTCCAGTGTCTGCAATATC  | ciRS-7 circle    |
| >SRR5048080.94785784_4487883_  | 16       | 1451     | -1435   | TGTGTCAAGGTCTTCCAACA  | GACATTCAGGTCTTCCAGTG  | ciRS-7 circle    |
| >SRR5048129.12555659_2744061_  | 1431     | -4       | 1435    | CTCCAGTGTGTGATCTTCT   | CCAGGGTTTCCGATGGCACC  | ciRS-7 circle    |
| >SRR5048129.13833719_1834963_  | -10      | 1425     | -1435   | CAATATCCAGGGTTCCGAT   | CAACGTCTCCAGTGTGCTGA  | ciRS-7 circle    |
| >SRR5048129.17755068_3311121_  | -10      | 1425     | -1435   | CAATATCCAGGGTTCCGAT   | CAACGTCTCCAGTGTGCTGA  | ciRS-7 circle    |
| >SRR5048129.18893587_1058036_  | 22       | 1457     | -1435   | AAGGTCTTCCAACAACCTCCG | CAGGTCTTCCAGTGTCTGCA  | ciRS-7 circle    |
| >SRR5048129.27996523_1639205_  | 1431     | -4       | 1435    | CTCCAGTGTGTGATCTTCT   | CCAGGGTTTCCGATGGCACC  | ciRS-7 circle    |
| >SRR5048129.28487901_2895202_  | 1431     | -4       | 1435    | CTCCAGTGTGTGATCTTCT   | CCAGGGTTTCCGATGGCACC  | ciRS-7 circle    |
| >SRR5048129.29856715_1306793_  | 1438     | 3        | 1435    | GTGCTGATCTTCTGACATTC  | TTCCGATGGCACCTGTGTCA  | ciRS-7 circle    |
| >SRR5048129.30001069_385713_   | 23       | 1458     | -1435   | AGGTCTTCCAACAACCTCCGG | AGGTCTTCCAGTGTCTGCAA  | ciRS-7 circle    |
| >SRR5048129.31791353_1097441_  | 2        | 1437     | -1435   | TTCCGATGGCACCTGTGTCT  | TGTGCTGATCTTCTGACATT  | ciRS-7 circle    |
| >SRR5048129.35480370_2522009_  | -2       | 1433     | -1435   | AGGGTTTCCGATGGCACCAAG | CCAGTGTGTGATCTTCTGA   | ciRS-7 circle    |
| >SRR5048129.3892134_564946_    | -8       | 1427     | -1435   | ATATCCAGGGTTTCCGATGG  | ACGTCTCCAGTGTGTGATC   | ciRS-7 circle    |
| >SRR5048129.41692879_1636627_  | 23       | 1458     | -1435   | AGGTCTTCCAACAACCTCCGG | AGGTCTTCCAGTGTCTGCAA  | ciRS-7 circle    |
| >SRR5048129.42238903_1974507_  | -3       | 1432     | -1435   | CAGGGTTTCCGATGGCACCT  | TCCAGTGTGTGATCTTCTG   | ciRS-7 circle    |
| >SRR5048129.4292261_2644040_   | 23       | 1458     | -1435   | AGGTCTTCCAACAACCTCCGG | AGGTCTTCCAGTGTCTGCAA  | ciRS-7 circle    |
| >SRR5048129.4486553_128998_    | 14       | 1449     | -1435   | CCTGTGTCAAGGTCTTCCAA  | CTGACATTCAGGTCTTCCAG  | ciRS-7 circle    |
| >SRR5048129.47675279_3081710_  | 30       | 1465     | -1435   | CCAACAACCTCCGGGTCTTCC | CCAGTGTCTGCAATATCCAG  | ciRS-7 circle    |
| >SRR5048129.82072305_1315148_  | 25       | 1460     | -1435   | GTCTTCCAACAACCTCCGGGT | GTCTTCCAGTGTCTGCAATA  | ciRS-7 circle    |
| >SRR5048129.84877420_3001719_  | 20       | 1455     | -1435   | TCAAGGTCTTCCAACAACCT  | TTCAGGTCTTCCAGTGTCTG  | ciRS-7 circle    |

|                              |     |      |       |                     |                      |                      |
|------------------------------|-----|------|-------|---------------------|----------------------|----------------------|
| >SRR5048129.88921537_583804_ | -9  | 1426 | -1435 | AATATCCAGGGTTCCGATG | AACGTCTCCAGTGTGCTGAT | <b>ciRS-7 circle</b> |
| >SRR5048080.4741543_1944104_ | 343 | 1442 | -1099 | AAAATCTGTGTCTTCACCA | TGATCTTCTGACATTCAGGT |                      |

# MOUSE OUTPUT

(Offsets are with respect to the annotated CDR1 sense transcript)

| READ-id              | offset_1 | offset_2 | absdiff | seq1                  | seq2                 | Splice        |
|----------------------|----------|----------|---------|-----------------------|----------------------|---------------|
| @SRR1785046.15164429 | 658      | 85879    | -85221  | TGGGAAGACTTGGACTTCTG  | AAAAAAAAAAAAAAAAAAAA |               |
| @SRR1785046.15164429 | -73655   | 658      | -74313  | AAAAAAAAAAAAAAAAAAAA  | TGGGAAGACTTGGACTTCTG |               |
| @SRR1785046.8863940  | -18221   | 2288     | -20509  | ATTACAGTTTCAGAGGAGG   | TTGGTACTGGCACCCTGG   | Novel circRNA |
| @SRR1785046.13497132 | -18219   | 2290     | -20509  | TTACAGTTTCAGAGGAGGAG  | GGTACTGGCACCCTGGAA   | Novel circRNA |
| @SRR1785046.11591060 | -1113    | 5582     | -6695   | TTGTTATTATTATTATTATT  | AATAATAATAATAATAACAA |               |
| @SRR1785046.18577289 | -1122    | 5556     | -6678   | TTATTATTATTGTTATTATT  | ATAATAACAATAATAATAA  |               |
| @SRR1785046.14815206 | -617     | 2281     | -2898   | CCCTGGATACGGCAGACACC  | GAAGACCTTGGTACTGGCA  | ciRS-7 circle |
| @SRR1785046.4033180  | -617     | 2281     | -2898   | CCCTGGATACGGCAGACACC  | GAAGACCTTGGTACTGGCA  | ciRS-7 circle |
| @SRR1785046.295357   | -616     | 2282     | -2898   | CCTGGATACGGCAGACACCA  | AAGACCTTGGTACTGGCAC  | ciRS-7 circle |
| @SRR1785046.11903117 | -614     | 2284     | -2898   | TGGATACGGCAGACACCAGA  | GACCTTGGTACTGGCACCA  | ciRS-7 circle |
| @SRR1785046.1735563  | -614     | 2284     | -2898   | TGGATACGGCAGACACCAGA  | GACCTTGGTACTGGCACCA  | ciRS-7 circle |
| @SRR1785046.19719917 | -614     | 2284     | -2898   | TGGATACGGCAGACACCAGA  | GACCTTGGTACTGGCACCA  | ciRS-7 circle |
| @SRR1785046.20420244 | -614     | 2284     | -2898   | TGGATACGGCAGACACCAGA  | GACCTTGGTACTGGCACCA  | ciRS-7 circle |
| @SRR1785046.5706212  | -614     | 2284     | -2898   | TGGATACGGCAGACACCAGA  | GACCTTGGTACTGGCACCA  | ciRS-7 circle |
| @SRR1785046.7571323  | -614     | 2284     | -2898   | TGGATACGGCAGACACCAGA  | GACCTTGGTACTGGCACCA  | ciRS-7 circle |
| @SRR1785046.15092498 | -613     | 2285     | -2898   | GGATACGGCAGACACCAGAA  | ACCTTGGTACTGGCACCAC  | ciRS-7 circle |
| @SRR1785046.15495250 | -613     | 2285     | -2898   | GGATACGGCAGACACCAGAC  | ACCTTGGTACTGGCACCAC  | ciRS-7 circle |
| @SRR1785046.17805708 | -613     | 2285     | -2898   | GGATACGGCAGACACCAGAA  | GCCTTGGTACTGGCACCAC  | ciRS-7 circle |
| @SRR1785046.15887301 | -608     | 2290     | -2898   | CGGACAGACACCAGAAAACCT | GGTACTGGCACCCTGGAA   | ciRS-7 circle |
| @SRR1785046.15598539 | -607     | 2291     | -2898   | GGCAGACACCAGAAAACCTG  | GTACTGGCACCCTGGAAA   | ciRS-7 circle |
| @SRR1785046.16084222 | -607     | 2291     | -2898   | GGCAGACACCAGAAAACCTG  | GTACTGGCACCCTGGAAA   | ciRS-7 circle |
| @SRR1785046.3012701  | -606     | 2292     | -2898   | GACAGACACCAGAAAACCTGA | TACTGGCACCCTGGAAAAC  | ciRS-7 circle |
| @SRR1785046.3764585  | -606     | 2292     | -2898   | GACAGACACCAGAAAACCTGA | TACTGGCACCCTGGAAAAC  | ciRS-7 circle |
| @SRR1785046.11337835 | -605     | 2293     | -2898   | CAGACACCAGAAAACCTGAA  | ACTGGCACCCTGGAAAACC  | ciRS-7 circle |
| @SRR1785046.3469567  | -605     | 2293     | -2898   | CAGACACCAGAAAACCTGAA  | ACTGGCACCCTGGAAAACC  | ciRS-7 circle |
| @SRR1785046.10735139 | -602     | 2296     | -2898   | ACACCAGAAAACCTGAATGT  | GGCACCCTGGAAAACCTG   | ciRS-7 circle |
| @SRR1785046.13906927 | -602     | 2296     | -2898   | ACACCAGAAAACCTGAATGT  | GGCACCCTGGAAAACCTG   | ciRS-7 circle |
| @SRR1785046.9999855  | -602     | 2296     | -2898   | ACACCAGAAAACCTGAATGT  | GGCACCCTGGAAAACCTG   | ciRS-7 circle |
| @SRR1785046.2358671  | -601     | 2297     | -2898   | CACCAGAAAACCTGAATGTC  | GCACCCTGGAAAACCTGG   | ciRS-7 circle |
| @SRR1785046.9906804  | -601     | 2297     | -2898   | CACCAGAAAACCTGAATGTC  | GCACCCTGGAAAACCTGG   | ciRS-7 circle |
| @SRR1785046.10904736 | -600     | 2298     | -2898   | ACCAGAAAACCTGAATGTCA  | CACCCTGGAAAACCTGGGA  | ciRS-7 circle |
| @SRR1785046.20378296 | -600     | 2298     | -2898   | ACCAGAAAACCTGAATGTCA  | CACCCTGGAAAACCTGGGA  | ciRS-7 circle |
| @SRR1785046.5451982  | -600     | 2298     | -2898   | ACCAGAAAACCTGAATGTCA  | CACCCTGGAAAACCTGGGA  | ciRS-7 circle |
| @SRR1785046.8440302  | -600     | 2298     | -2898   | ACCAGAAAACCTGAATGTCA  | CACCCTGGAAAACCTGGGA  | ciRS-7 circle |
| @SRR1785046.10661832 | -599     | 2299     | -2898   | CCAGAAAACCTGAATGTCAA  | ACCCTGGAAAACCTGGAT   | ciRS-7 circle |
| @SRR1785046.11556819 | -599     | 2299     | -2898   | CCAGAAAACCTGAATGTCAA  | ACCCTGGAAAACCTGGAT   | ciRS-7 circle |
| @SRR1785046.14371276 | -599     | 2299     | -2898   | CCAGAAAACCTGAATGTCAA  | ACCCTGGAAAACCTGGAT   | ciRS-7 circle |
| @SRR1785046.15933337 | -599     | 2299     | -2898   | CCAGAAAACCTGAATGTCAA  | ACCCTGGAAAACCTGGAT   | ciRS-7 circle |
| @SRR1785046.17830265 | -599     | 2299     | -2898   | CCAGAAAACCTGAATGTCAA  | ACCCTGGAAAACCTGGAT   | ciRS-7 circle |
| @SRR1785046.2616745  | -599     | 2299     | -2898   | CCAGAAAACCTGAATGTCAA  | ACCCTGGAAAACCTGGAT   | ciRS-7 circle |
| @SRR1785046.20519446 | -598     | 2300     | -2898   | CAGAAAACCTGAATGTCAAA  | CCACTGGAAAACCTGGATA  | ciRS-7 circle |
| @SRR1785046.21494467 | -598     | 2300     | -2898   | CAGAAAACCTGAATGTCAAA  | CCACTGGAAAACCTGGATA  | ciRS-7 circle |
| @SRR1785046.4258213  | -598     | 2300     | -2898   | CAGAAAACCTGAATGTCAAA  | CCACTGGAAAACCTGGATA  | ciRS-7 circle |
| @SRR1785046.1361010  | -617     | 2280     | -2897   | CCCTGGATACGGCAGACACC  | GGAAGACCTTGGTACTGGCA | ciRS-7 circle |
| @SRR1785046.14961031 | -617     | 2280     | -2897   | CCCTGGATACGGCAGACACC  | GGAAGACCTTGGTACTGGCA | ciRS-7 circle |
| @SRR1785046.15399484 | -617     | 2280     | -2897   | CCCTGGATACGGCAGACACC  | GGAAGACCTTGGTACTGGCA | ciRS-7 circle |
| @SRR1785046.18722677 | -617     | 2280     | -2897   | CCCTGGATACGGCAGACACC  | GGAAGACCTTGGTACTGGCA | ciRS-7 circle |
| @SRR1785046.21578930 | -617     | 2280     | -2897   | CCCTGGATACGGCAGACACC  | GGAAGACCTTGGTACTGGCA | ciRS-7 circle |
| @SRR1785046.9423738  | -617     | 2280     | -2897   | CCCTGGATACGGCAGACACC  | GGAAGACCTTGGTACTGGCA | ciRS-7 circle |
| @SRR1785046.4152384  | -616     | 2281     | -2897   | CCTGGATACGGCAGACACCA  | GAAGACCTTGGTACTGGCAC | ciRS-7 circle |
| @SRR1785046.19867856 | -615     | 2282     | -2897   | CTGGATACGGCAGACACCA   | AAGACCTTGGTACTGGCAC  | ciRS-7 circle |

|                      |      |      |       |                      |                       |               |
|----------------------|------|------|-------|----------------------|-----------------------|---------------|
| @SRR1785046.7399010  | -614 | 2283 | -2897 | TGGATACGGCAGACACCAGA | AGACCTTGGTACTGGCACCA  | ciRS-7 circle |
| @SRR1785046.9713030  | -614 | 2283 | -2897 | TGGATACGGCAGACACCAGA | AGACCTTGGTACTGGCACCA  | ciRS-7 circle |
| @SRR1785046.21011419 | -613 | 2284 | -2897 | GGATACGGCAGACACCAGAA | GACCTTGGTACTGGCACCA   | ciRS-7 circle |
| @SRR1785046.14064701 | -612 | 2285 | -2897 | GATACGGCAGACACCAGAAA | ACCTTGGTACTGGCACCACT  | ciRS-7 circle |
| @SRR1785046.14413614 | -610 | 2287 | -2897 | TACGGCAGACACCAGAAAAC | CTTGGTACTGGCACCACTGG  | ciRS-7 circle |
| @SRR1785046.15149512 | -610 | 2287 | -2897 | TACGGCAGACACCAGAAAAC | CTTGGTACTGGCACCACTGG  | ciRS-7 circle |
| @SRR1785046.16353756 | -610 | 2287 | -2897 | TACGGCAGACACCAGAAAAC | CTTGGTACTGGCACCACTGG  | ciRS-7 circle |
| @SRR1785046.18912107 | -610 | 2287 | -2897 | TACGGCAGACACCAGAAAAC | CTTGGTACTGGCACCACTGG  | ciRS-7 circle |
| @SRR1785046.21623663 | -610 | 2287 | -2897 | TACGGCAGACACCAGAAAAC | CTTGGTACTGGCACCACTGG  | ciRS-7 circle |
| @SRR1785046.14620904 | -608 | 2289 | -2897 | CGGCAGACACCAGAAAACCT | TGGTACTGGCACCACTGGAA  | ciRS-7 circle |
| @SRR1785046.16324720 | -608 | 2289 | -2897 | CGGCAGACACCAGAAAACCT | TGGTACTGGCACCACTGGAA  | ciRS-7 circle |
| @SRR1785046.13871680 | -607 | 2290 | -2897 | GGCAGACACCAGAAAACCTG | GGTACTGGCACCACTGGAAA  | ciRS-7 circle |
| @SRR1785046.18323236 | -607 | 2290 | -2897 | GGCAGACACCAGAAAACCTG | GGTACTGGCACCACTGGAAA  | ciRS-7 circle |
| @SRR1785046.3719266  | -607 | 2290 | -2897 | GGCAGACACCAGAAAACCTG | GGTACTGGCACCACTGGAAA  | ciRS-7 circle |
| @SRR1785046.4477878  | -607 | 2290 | -2897 | GGCAGACACCAGAAAACCTG | GGTACTGGCACCACTGGAAA  | ciRS-7 circle |
| @SRR1785046.12301350 | -606 | 2291 | -2897 | GCAGACACCAGAAAACCTGA | GTACTGGCACCACTGGAAAC  | ciRS-7 circle |
| @SRR1785046.4007206  | -606 | 2291 | -2897 | GCAGACACCAGAAAACCTGA | GTACTGGCACCACTGGAAAC  | ciRS-7 circle |
| @SRR1785046.14339710 | -604 | 2293 | -2897 | AGACACCAGAAAACCTGAAT | ACTGGCACCACTGGAAACCC  | ciRS-7 circle |
| @SRR1785046.14354049 | -604 | 2293 | -2897 | AGACACCAGAAAACCTGAAT | ACTGGCACCACTGGAAACCC  | ciRS-7 circle |
| @SRR1785046.15743401 | -604 | 2293 | -2897 | AGACACCAGAAAACCTGAAT | ACTGGCACCACTGGAAACCC  | ciRS-7 circle |
| @SRR1785046.18024870 | -604 | 2293 | -2897 | AGACACCAGAAAACCTGAAT | ACTGGCACCACTGGAAACCC  | ciRS-7 circle |
| @SRR1785046.18342953 | -604 | 2293 | -2897 | AGACACCAGAAAACCTGAAT | ACTGGCACCACTGGAAACCC  | ciRS-7 circle |
| @SRR1785046.18663450 | -604 | 2293 | -2897 | AGACACCAGAAAACCTGAAT | ACTGGCACCACTGGAAACCC  | ciRS-7 circle |
| @SRR1785046.20914385 | -604 | 2293 | -2897 | AGACACCAGAAAACCTGAAT | ACTGGCACCACTGGAAACCC  | ciRS-7 circle |
| @SRR1785046.3084241  | -604 | 2293 | -2897 | AGACACCAGAAAACCTGAAT | ACTGGCACCACTGGAAACCC  | ciRS-7 circle |
| @SRR1785046.9329119  | -604 | 2293 | -2897 | AGACACCAGAAAACCTGAAT | ACTGGCACCACTGGAAACCC  | ciRS-7 circle |
| @SRR1785046.9754545  | -604 | 2293 | -2897 | AGACACCAGAAAACCTGAAT | ACTGGCACCACTGGAAACCC  | ciRS-7 circle |
| @SRR1785046.15322178 | -603 | 2294 | -2897 | GACACCAGAAAACCTGAATG | CTGGCACCACTGGAAACCCCT | ciRS-7 circle |
| @SRR1785046.5026667  | -603 | 2294 | -2897 | GACACCAGAAAACCTGAATG | CTGGCACCACTGGAAACCCCT | ciRS-7 circle |
| @SRR1785046.529872   | -603 | 2294 | -2897 | GACACCAGAAAACCTGAATG | CTGGCACCACTGGAAACCCCT | ciRS-7 circle |
| @SRR1785046.11406494 | -602 | 2295 | -2897 | ACACCAGAAAACCTGAATGT | TGGCACCACTGGAAACCCCTG | ciRS-7 circle |
| @SRR1785046.14078477 | -602 | 2295 | -2897 | ACACCAGAAAACCTGAATGT | TGGCACCACTGGAAACCCCTG | ciRS-7 circle |
| @SRR1785046.3921146  | -602 | 2295 | -2897 | ACACCAGAAAACCTGAATGT | TGGCACCACTGGAAACCCCTG | ciRS-7 circle |
| @SRR1785046.512597   | -602 | 2295 | -2897 | ACACCAGAAAACCTGAATGT | TGGCACCACTGGAAACCCCTG | ciRS-7 circle |
| @SRR1785046.7331108  | -602 | 2295 | -2897 | ACACCAGAAAACCTGAATGT | TGGCACCACTGGAAACCCCTG | ciRS-7 circle |
| @SRR1785046.115692   | -601 | 2296 | -2897 | CACCAGAAAACCTGAATGTC | GGCACCACTGGAAACCCCTGG | ciRS-7 circle |
| @SRR1785046.14546509 | -601 | 2296 | -2897 | CACCAGAAAACCTGAATGTC | GGCACCACTGGAAACCCCTGG | ciRS-7 circle |
| @SRR1785046.15031600 | -601 | 2296 | -2897 | CACCAGAAAACCTGAATGTC | GGCACCACTGGAAACCCCTGG | ciRS-7 circle |
| @SRR1785046.16560945 | -601 | 2296 | -2897 | CACCAGAAAACCTGAATGTC | GGCACCACTGGAAACCCCTGG | ciRS-7 circle |
| @SRR1785046.17959900 | -601 | 2296 | -2897 | CACCAGAAAACCTGAATGTC | GGCACCACTGGAAACCCCTGG | ciRS-7 circle |
| @SRR1785046.18529774 | -601 | 2296 | -2897 | CACCAGAAAACCTGAATGTC | GGCACCACTGGAAACCCCTGG | ciRS-7 circle |
| @SRR1785046.19522094 | -601 | 2296 | -2897 | CACCAGAAAACCTGAATGTC | GGCACCACTGGAAACCCCTGG | ciRS-7 circle |
| @SRR1785046.19573975 | -601 | 2296 | -2897 | CACCAGAAAACCTGAATGTC | GGCACCACTGGAAACCCCTGG | ciRS-7 circle |
| @SRR1785046.20208004 | -601 | 2296 | -2897 | CACCAGAAAACCTGAATGTC | GGCACCACTGGAAACCCCTGG | ciRS-7 circle |
| @SRR1785046.2431671  | -601 | 2296 | -2897 | CACCAGAAAACCTGAATGTC | GGCACCACTGGAAACCCCTGG | ciRS-7 circle |
| @SRR1785046.9308638  | -601 | 2296 | -2897 | CACCAGAAAACCTGAATGTC | GGCACCACTGGAAACCCCTGG | ciRS-7 circle |
| @SRR1785046.14831703 | -600 | 2297 | -2897 | ACCAGAAAACCTGAATGTCA | GCACCACTGGAAACCCCTGGA | ciRS-7 circle |
| @SRR1785046.19399803 | -600 | 2297 | -2897 | ACCAGAAAACCTGAATGTCT | GCACCACTGGAAACCCCTGGA | ciRS-7 circle |
| @SRR1785046.303485   | -600 | 2297 | -2897 | ACCAGAAAACCTGAATGTCT | GCACCACTGGAAACCCCTGGA | ciRS-7 circle |
| @SRR1785046.8453217  | -600 | 2297 | -2897 | ACCAGAAAACCTGAATGTCA | GCACCACTGGAAACCCCTGGA | ciRS-7 circle |
| @SRR1785046.14652499 | -599 | 2298 | -2897 | CCAGAAAACCTGAATGTCAA | CACCACTGGAAACCCCTGGAT | ciRS-7 circle |
| @SRR1785046.17313966 | -599 | 2298 | -2897 | CCAGAAAACCTGAATGTCAA | CACCACTGGAAACCCCTGGAT | ciRS-7 circle |
| @SRR1785046.20127525 | -599 | 2298 | -2897 | CCAGAAAACCTGAATGTCAA | CACCACTGGAAACCCCTGGAT | ciRS-7 circle |
| @SRR1785046.21624889 | -599 | 2298 | -2897 | CCAGAAAACCTGAATGTCAA | CACCACTGGAAACCCCTGGAT | ciRS-7 circle |



|                      |      |      |       |                      |                      |                  |
|----------------------|------|------|-------|----------------------|----------------------|------------------|
| @SRR1785046.14805258 | -598 | 2299 | -2897 | CAGAAAACCTGAATGTCAAG | ACCACTGGAAACCTGGATA  | ciRS-7 circle    |
| @SRR1785046.20880558 | -598 | 2299 | -2897 | CAGAAAACCTGAATGTCAAG | ACCACTGGAAACCTGGATA  | ciRS-7 circle    |
| @SRR1785046.11393391 | -470 | 2253 | -2723 | AGACCTGGAGGTGAAGGAAG | GCAGTTGCTGGAAGACCTGG |                  |
| @SRR1785046.12846588 | -322 | 2263 | -2585 | CATGGATTGTGGAAGGCAT  | GAAGACCTGGAGATGTTGG  |                  |
| @SRR1785046.2991319  | -358 | 2174 | -2532 | CGTAGATTTTtaggaagact | GAAGACATATATCATCTGGA |                  |
| @SRR1785046.19438809 | -289 | 2170 | -2459 | GACATGGATTTTCCAGAAGA | GTTGGAAGACATATATCATC |                  |
| @SRR1785046.14979869 | -148 | 2277 | -2425 | AGACATGGATTTTGGGAAGG | GTTGGAAGACCTTGGTACTG |                  |
| @SRR1785046.8692546  | -290 | 2116 | -2406 | AGACATGGATTTTCCAGAAG | CACGGAAGATCTAGATACCA |                  |
| @SRR1785046.6171735  | -373 | 1970 | -2343 | TAGATTTGTGGAAGGCGTAG | AGACTTGGATTTTCTGGA   |                  |
| @SRR1785046.14228459 | -165 | 2099 | -2264 | GGCATAGATTTTcaggaaga | CCAGAAGATCTAGATATCAC |                  |
| @SRR1785046.10651391 | -28  | 2216 | -2244 | TTCAGGAAGATTTGGATTTT | TGATTGCTGGAAGACCTT   |                  |
| @SRR1785046.3378798  | -81  | 1972 | -2053 | CACGAAGACATGGATTTTGT | ACTTGGATTTTTCAGGAAGA |                  |
| @SRR1785046.11346947 | 2294 | 3972 | -1678 | CTGGCACCCTGGAAACCT   | TATTACTTGGTCTAGATC   | Novel Linear RNA |
| @SRR1785046.18464861 | 299  | 1935 | -1636 | GGGAAGACTTGGATTTCTGG | CTTGGATTTTTCAGGAAGAC |                  |
| @SRR1785046.5391078  | -175 | 1361 | -1536 | ATTTATGGAAGGCATAGATT | GGGAAGACTCGGATTTTCAG |                  |
| @SRR1785046.19254497 | 187  | 1718 | -1531 | TTCTGGGAAGACTCGGATTT | TAATTTTCAGGAAGACATAG |                  |
| @SRR1785046.7935027  | -288 | 1229 | -1517 | ACATTGATTTTCCAGAAGAC | ATTTTCCGGAAGACTTGGAT |                  |
| @SRR1785046.4067421  | -56  | 1445 | -1501 | TCGTGGATTTTGGGAAGAT  | ATTTCTGGGAAGACATGGAT |                  |
| @SRR1785046.8573577  | 109  | 1466 | -1357 | ACAGATTACTGGGAAGAAGT | TTCGGAAGACTTCGATTT   |                  |
| @SRR1785046.18976692 | 117  | 1473 | -1356 | CTGGGAAGAAGTGGATCTTT | AGACTTCGATTTCTGGGAAG |                  |
| @SRR1785046.2304252  | 622  | 1972 | -1350 | TGGGAAGACTTGGACTTCTG | ACTTGGATTTTTCGGGAAGA |                  |
| @SRR1785046.17888453 | 170  | 1479 | -1309 | TCTGGGAAGACTTGGACTTC | CGATTTCTGGGAAGACTTG  |                  |
| @SRR1785046.2022621  | -275 | 971  | -1246 | AGAAGACTTGGATTTCTGGG | ACTTGGATTTCTGGGAAGAC |                  |
| @SRR1785046.20683963 | -60  | 1172 | -1232 | GAAGTCGTGGATTTTGGGA  | TGGATTTTCGGGAAGACTT  |                  |
| @SRR1785046.10520557 | -115 | 1086 | -1201 | GGAAGACTTGGATTTTCAGG | CTTCTGGGAAAACGTAGATT |                  |
| @SRR1785046.13923387 | 283  | 1461 | -1178 | GAAGACTCGGACTTCTGGGA | GGATTTTCGGGAAGACTTC  |                  |
| @SRR1785046.7498862  | 165  | 1293 | -1128 | GGACTTCTGGGAAGACTTGG | AGACTTCGATTTCCAGAAG  |                  |
| @SRR1785046.7247968  | 480  | 1604 | -1124 | GGAAGACTTCGATTTCTGGG | GTGGATTTAATGGAAGACT  |                  |
| @SRR1785046.21187901 | -10  | 1076 | -1086 | TTTGGGAAGTCATGGATTTT | AAGACTTGGATTTCTGGGAA |                  |
| @SRR1785046.313192   | 389  | 1474 | -1085 | TGGAAGACTCGGATTTCTGG | GACTTCGATTTCTGGGAAGA |                  |
| @SRR1785046.13434682 | -20  | 1036 | -1056 | GATTTGGATTTTGGGAAGT  | CAGGAAGACTTGGACTTATG |                  |
| @SRR1785046.15761233 | -33  | 1000 | -1033 | GATTTTTCAGGAAGACTTGG | CGGGAAGACTTGGATTTTCG |                  |
